# Supplementary material for: Preparation of Calcined Zirconia-Carbon Composite from Metal Organic Frameworks and Its Application to Adsorption of Crystal Violet and Salicylic Acid
Source: MDPI journal article supplement (doi:10.3390/ma9040261), 2016-03-31
Supplement: s1 [file s1]

# Supplementary Materials: Preparation of Calcined Zirconia-Carbon Composite from Metal Organic Frameworks and Its Application to Adsorption of Crystal Violet and Salicylic Acid

Zubair Hasan, Dong-Wan Cho, In-Hyun Nam, Chul-Min Chon and Hocheol Song

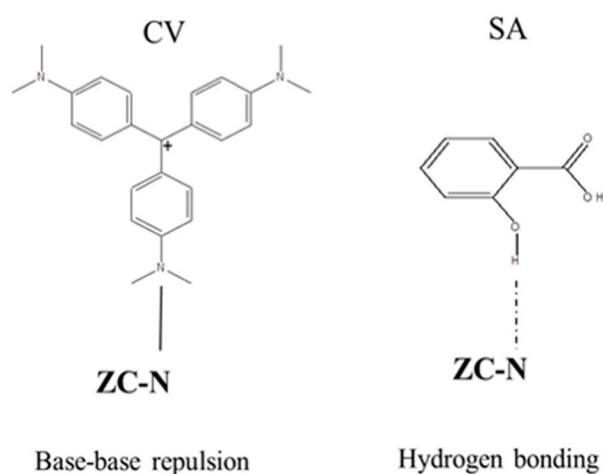

**Figure S1.** Structures of crystal violet (CV) and salicylic acid (SA), and plausible interactions between N-functionalized zirconia-carbon composites ZCN composites and adsorbates.

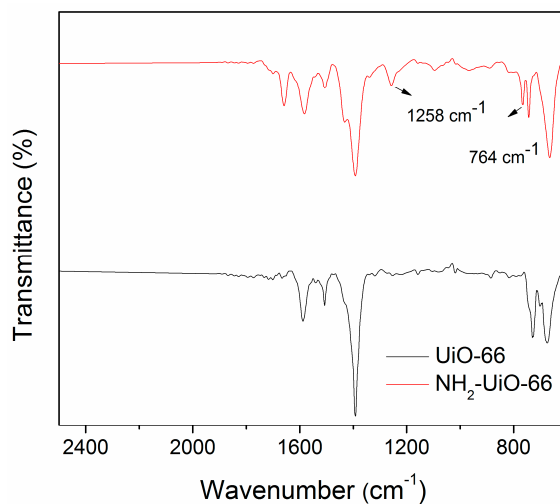

**Figure S2.** Fourier transform infrared spectroscopy (FTIR)spectra of UiO-66 and  $\text{NH}_2$ -UiO-66 (UiO stands for University of Oslo).

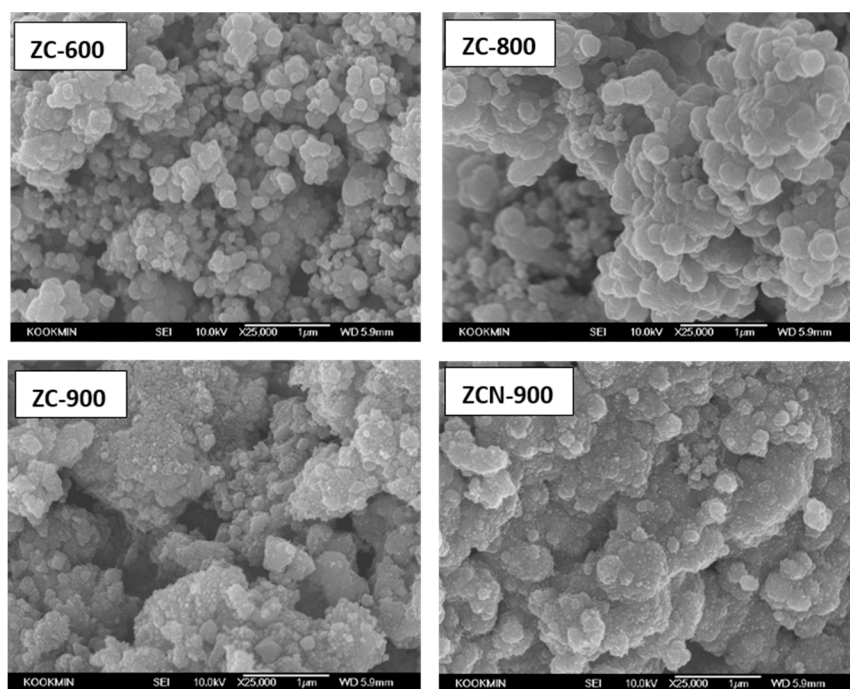

**Figure S3.** Field emission scanning electron microscope (FE-SEM) images of ZC-600, ZC-800, ZC-900, and ZNC-900.

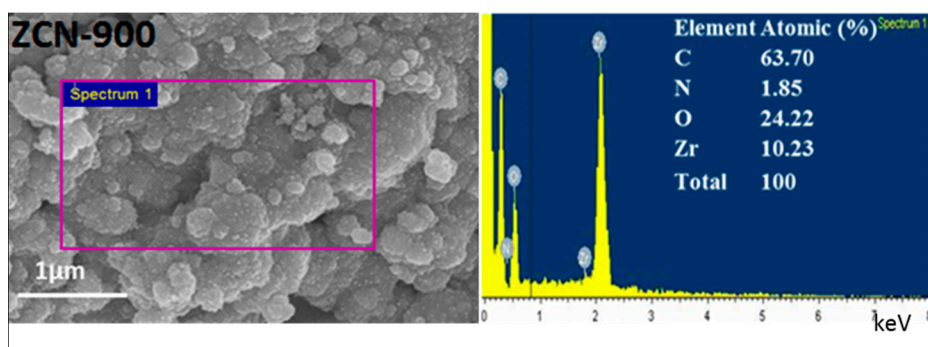

**Figure S4.** Images of ZC-900 after adsorption of CV obtained using field emission scanning electron microscope coupled with energy-dispersive X-ray spectroscopy (FE-SEM/EDS).

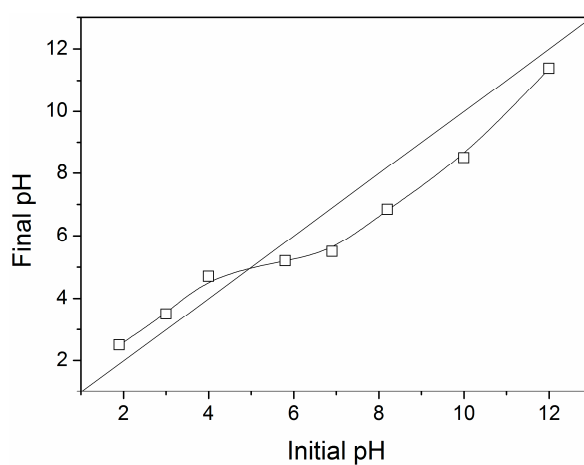

**Figure S5.** Determination of the pH at the zero point charge for ZC-900 by the pH drift method.
